# Supplementary material for: A Research Agenda to Advance the Coordination of Care for General Medical and Substance Use Disorders
Source: Atypon-hosted journal article supplement (doi:10.1176/appi.ps.201600070), 2016-09-15
Supplement: appi.ps.201600070.ds001.pdf [file appi.ps.201600070.ds001.pdf]

## **ONLINE SUPPLEMENT**

### **Identifying and engaging patients in general medical settings**

Screening and brief intervention in general medical settings has been found to reduce alcohol use and hospital utilization (1), injuries (2), driving under the influence of alcohol (3), and mortality (4). However, the efficacy of screening and brief intervention has not been consistent across research studies. Outcomes vary by substance used, setting, severity, population, and patient readiness to change (5).

Many experimental studies have found that alcohol screening and brief intervention in primary care (6), emergency medicine departments (7, 8) and trauma centers (2, 3) reduce alcohol use among adults with unhealthy alcohol use (9). Studies in non-medical settings, including educational (10), social service (11), and criminal justice settings (11), have also found alcohol screening and brief intervention reduce alcohol use and related consequences. However, screening and brief intervention in inpatient hospital settings have yielded mixed results (6, 12), and a systematic review of randomized control trials (RCTs) of alcohol screening and brief intervention found that it was not efficacious for adult patients with very heavy use or dependence (13). A systematic review of seven RCTs of adolescent alcohol screening and brief intervention in acute care settings was inconclusive (14).

Drug use screening and brief intervention have not been endorsed widely. Early evidence suggested that screening for drug use may have efficacy in reducing drug use for adults and adolescents (15-19), but recent more robust data from two RCTs on drug screening and brief intervention in primary care found no effect on unhealthy drug use (20, 21).

Further, screening and brief intervention has not been consistently found to be effective after implementation in clinical practice (22). This may be because implementation is impacted by practice issues such as organizational climate (23). Referrals to specialty care are also challenging because general medical providers may be unaware of specialty addiction services and unable to communicate with specialty addiction providers due to the common separation of addiction and general medical care services and privacy regulations.

Emerging technologies, like computer-delivered brief interventions and smartphones (24-27), and integrated delivery settings like the medical home, present opportunities to improve identification of particular patient populations, patient engagement, and the delivery of substance use disorder interventions. Medications for opioid and alcohol use disorders have been recommended in general medical settings (28, 29) and, in the case of opioid pharmacotherapy, can facilitate treatment initiation and engagement in general medical (30) and specialty care settings (31, 32).

### **Future of chronic disease management**

Researchers and clinicians are increasingly recognizing that treatment of substance use disorders requires ongoing, patient-centered, and coordinated care (33-36). Chronic disease management of substance use disorders is based on the chronic care model (37) and has many theoretical advantages. The model recognizes the full range of substance use disorders, takes into account patient preference, integrates evidence-based practices, and uses clinical information systems to coordinate care. It has been effective for other chronic conditions such as diabetes (38, 39) and depression (40, 41).

Successful implementation of chronic disease management for substance use disorders requires innovations, advances, and reorganization, many of which are already underway (35, 36, 42). However, barriers that limit patient access and participation in addiction treatment still exist (43).

The chronic care model for substance use disorders has not been broadly tested. Only one RCT has implemented all six elements outlined in the chronic care model (44, 45). This study found that chronic care management was no more effective than standard primary care and referral in helping

patients reduce alcohol and drug use, although the chronic care model approach increased treatment utilization (45). However, patients who received care that was most consistent with the principles of chronic disease management in either the chronic care management condition or the standard primary care condition were more likely to be abstinent from drugs and heavy drinking and to have lower addiction severity (44). An RCT among homeless women with alcohol use problems also found chronic disease management was no more effective than treatment as usual, although women who received chronic care were more likely to utilize treatment services (46).

In contrast, many of the individual components of chronic disease management for substance use disorders have research support, such as co-location of services, use of evidence based practices, and care integration (35, 47). Integration of outpatient general medical care and specialty addiction services has been shown to increase abstinence and treatment utilization among patients with substance abuse-related general medical conditions (48), increase abstinence among alcohol dependent men (49), and reduce heavy drinking days (50).

Most physicians have not received adequate addiction medicine training, and this training gap must be addressed. Many physicians need, and some want, training in prescribing pharmacological treatments for substance use disorders (51). The effectiveness and cost-effectiveness of pharmacological treatment for alcohol and opioid use disorders is compelling (52-56); therefore, increasing prescribing in primary care is an important goal and was in fact achieved with the adoption of a chronic care model (57). Widespread implementation is possible (58) but will require training, shifts in attitudes, and institutional support (59-61).

Given that chronic disease management for substance use disorders is an emerging approach from which benefits are not uniform (unlike other chronic diseases), much remains to be learned. Patients receiving chronic disease management consistently took part in addiction treatment while control groups rarely utilized resources such as treatment referrals (45, 48, 50). This model might be effective but will require implementation utilizing the most beneficial dimensions of care and follow-up assessment to verify its value (38, 39, 41).

### **Including patient and family perspectives in care coordination**

The concepts of patient-centered care and shared decision making are fundamental to improving the quality of care for substance use disorders (62-65). Currently, the tenets of patient-centered care are rarely embodied in the management of alcohol or drug use disorders. After a substance use disorder is diagnosed in a general medical setting, a referral often would be made to a single type of treatment, without consideration of alternative evidence-based options or patient preferences. This treatment is frequently a specialty addiction rehabilitation program that is group-based, abstinence-oriented, and often guided by 12 Step recovery principles. Typically, these programs generally do not routinely offer evidence-based psychosocial treatment or effective medications available for alcohol and opioid use disorders (29, 61, 66, 67). Although many patients benefit from such treatment, most do not accept referral and few receive specialty addiction treatment (68).

Many effective psychosocial and pharmacological interventions for the spectrum of substance use disorders exist beyond specialty addiction treatment. The most consistently recommended evidence-based practices include contingency management, cognitive-behavioral therapy, motivational enhancement therapy, structured family therapies, and medications for alcohol and opioid use disorders (55, 56, 66, 69-72). Further, no single treatment is superior to all others (71, 73, 74). Given the context of addiction treatment—namely that no clear treatment approach is best for all patients, treatment goals and preferences can vary for different patients, and the responsibility to carry out treatment belongs to the patient—the importance of shared decision making becomes evident (65, 75).

Shared decision making to engage both patients and providers in the management of substance use disorders is a rich area for research in the addiction treatment field (75). The general literature suggests that shared decision making and the use of patient decision aids can help patients understand the risks and benefits of relevant options and share responsibility concerning the choice of treatment (76). Providers and patients should engage in discussions about the benefits, costs, and viability of treatment options, including convenience and opportunity costs (77). Some have advocated that providers should remain neutral with regard to the patient's goals and preferences for treatment, and focus on relating options to the patient's values (65). For example, privacy concerns may be more or less important to different patients and, therefore, treatment options might include those that are not documented in the EHR, such as mutual help groups and web-based interventions. Patient preferences affect treatment engagement (78) and offering patients a menu of options might prompt patients not actively seeking treatment to subsequently engage.

### **Paying for coordinated addiction and general medical care**

Current payment reforms are moving away from fee-for-service (FFS) to alternative payment models that shift financial risk from payers to providers, incentivizing providers to manage patients' utilization and emphasizing efficiency and coordination between providers. While FFS encourages acceptance of higher severity patients (79), such as individuals with co-occurring substance use disorder and mental and general health problems, it can discourage coordination between providers (79).

Public financing has traditionally played a large role in the provision of addiction services, while most general medical services are paid for through private and public insurance mechanisms (80). The Affordable Care Act shifts addiction treatment payment away from public financing toward insurance reimbursement. While this shift presents challenges to the addiction treatment system, it also presents the opportunity to promote coordination and integration of addiction and general medical care. Barriers to developing and implementing alternative payment and care delivery models include billing and credentialing regulations, billing and EHR infrastructure, workforce preparedness, and inter-organizational relationships. Overcoming these barriers will require changes in financing, administrative, and regulatory policy (81, 82).

No payment system for coordinated or integrated addiction and general medical care has been empirically tested (83). In general medical settings, alternative payment models have shown promising results in promoting coordinated care. There is evidence that global payment with quality incentives reduces spending and improves quality (84) and bundled payment for diabetes care improves care coordination among providers (85). Specific to addiction treatment, empirical evidence supports the notion that alternative payment models can improve the value of care and facilitate coordination. Weisner et al. found that integrated addiction treatment and primary care in a staff-model HMO improved outcomes (48) and reduced costs by facilitating referrals between primary care and specialty care (86). Providers in staff-model HMOs are commonly paid on a salary basis, which can allow more flexibility and time to address prevention efforts than FFS payment models depending on productivity expectations.

Risk mitigation and performance measurement are strategies to motivate providers to accept patients with substance use disorders and deliver specific services. Risk adjustment is an important technique to mitigate the risk of variation in costs due to variations in patient characteristics. Risk adjustment for mental health and substance use disorders is not as developed as in general medical care (87). Performance measurement is another strategy to encourage changes in addiction care delivery (88) and might be a powerful tool to include in payment models for coordinated and integrated addiction

care. Quasi-experimental results suggest that using performance incentives in integrated general medical and behavioral health care programs can improve care delivery and health outcomes (89).

## References

1. Fleming MF, Barry K, Manwell L, et al.: Brief physician advice for problem alcohol drinkers: A randomized controlled trial in community-based primary care practices. *JAMA* 277:1039-45, 1997
2. Gentilello LM, Rivara FP, Donovan DM, et al.: Alcohol interventions in a trauma center as a means of reducing the risk of injury recurrence. *Annals of Surgery* 230:473-, 1999
3. Schermer CR, Moyers TB, Miller WR, et al.: Trauma center brief interventions for alcohol disorders decrease subsequent driving under the influence arrests (with discussion). *Journal of Trauma, Injury, Infection and Critical Care* 60, 2006
4. Cuijpers P, Riper H, Lemmers L: The effects on mortality of brief interventions for problem drinking: A meta-analysis. *Addiction* 99:839-45, 2004
5. Saitz R: Lost in translation: The perils of implementing alcohol brief intervention when there are gaps in evidence and its interpretation. *Addiction* 109:1060-2, 2014
6. Kaner EF, Beyer F, Dickinson HO, et al.: Effectiveness of brief alcohol interventions in primary care populations. *Cochrane Database Syst Rev* 2, 2007
7. D'Onofrio G, Fiellin DA, Pantalon MV, et al.: A brief intervention reduces hazardous and harmful drinking in emergency department patients. *Annals of Emergency Medicine* 60:10.1016/j.annemergmed.2012.02.006, 2012
8. D'Onofrio G, Pantalon MV, Degutis LC, et al.: Brief intervention for hazardous and harmful drinkers in the emergency department. *Annals of Emergency Medicine* 51:742-50.e2, 2008
9. Moyer VA: Screening and behavioral counseling interventions in primary care to reduce alcohol misuse: U.S. Preventive services task force recommendation statement. *Annals of Internal Medicine* 159:210-8, 2013
10. Mitchell SG, Gryczynski J, O'Grady KE, et al.: Sbirt for adolescent drug and alcohol use: Current status and future directions. *Journal of substance abuse treatment* 44:463-72, 2013
11. Schmidt CS, McGovern R, Schulte B, et al.: Brief alcohol interventions in social service and criminal justice settings: A critical commentary. *British Journal of Social Work*, 2014
12. Saitz R, Palfai TP, Cheng DM, et al.: Brief intervention for medical inpatients with unhealthy alcohol use. *Annals of Internal Medicine* 146:167-W35, 2007
13. Saitz R: Alcohol screening and brief intervention in primary care: Absence of evidence for efficacy in people with dependence or very heavy drinking. *Drug and alcohol review* 29:631-40, 2010
14. Yuma-Guerrero PJ, Lawson KA, Velasquez MM, et al.: Screening, brief intervention, and referral for alcohol use in adolescents: A systematic review. *Pediatrics* 130:115-22, 2012
15. Bernstein E, Edwards E, Dorfman D, et al.: Screening and brief intervention to reduce marijuana use among youth and young adults in a pediatric emergency department. *Academic Emergency Medicine* 16:1174-85, 2009
16. Zahradnik A, Otto C, Crackau B, et al.: Randomized controlled trial of a brief intervention for problematic prescription drug use in non-treatment-seeking patients. *Addiction* 104:109-17, 2009
17. Bernstein J, Bernstein E, Tassiopoulos K, et al.: Brief motivational intervention at a clinic visit reduces cocaine and heroin use. *Drug & Alcohol Dependence* 77:49-59, 2005
18. Madras BK, Compton WM, Avula D, et al.: Screening, brief interventions, referral to treatment (SBIRT) for illicit drug and alcohol use at multiple healthcare sites: Comparison at intake and six months. *Drug and alcohol dependence* 99:280-95, 2009

19. Humeniuk R, Ali R, Babor T, et al.: A randomized controlled trial of a brief intervention for illicit drugs linked to the alcohol, smoking and substance involvement screening test (assist) in clients recruited from primary health-care settings in four countries. *Addiction* 107:957-66, 2012
20. Saitz R, Palfai TPA, Cheng DM, et al.: Screening and brief intervention for drug use in primary care: The aspire randomized clinical trial. *JAMA* 312:502-13, 2014
21. Roy-Byrne P, Bumgardner K, Krupski A, et al.: Brief intervention for problem drug use in safety-net primary care settings: A randomized clinical trial. *JAMA* 312:492-501, 2014
22. Williams EC, Rubinsky AD, Chavez LJ, et al.: An early evaluation of implementation of brief intervention for unhealthy alcohol use in the us veterans health administration. *Addiction* 109:1472-81, 2014
23. Cruvinel E, Richter KP, Bastos RR, et al.: Screening and brief intervention for alcohol and other drug use in primary care: Associations between organizational climate and practice. *Addiction Science & Clinical Practice* 8:4, 2013
24. Schwartz RP, Gryczynski J, Mitchell SG, et al.: Computerized versus in-person brief intervention for drug misuse: A randomized clinical trial. *Addiction* 109:1091-8, 2014
25. Hasin DS, Aharonovich E, Greenstein E: Healthcall for the smartphone: Technology enhancement of brief intervention in hiv alcohol dependent patients. *Addiction Science & Clinical Practice* 9:5-, 2014
26. Gajecki M, Berman AH, Sinadinovic K, et al.: Mobile phone brief intervention applications for risky alcohol use among university students: A randomized controlled study. *Addiction Science & Clinical Practice* 9:11-, 2014
27. Patton R, Deluca P, Kaner E, et al.: Alcohol screening and brief intervention for adolescents: The how, what and where of reducing alcohol consumption and related harm among young people. *Alcohol and Alcoholism* 49:207-12, 2014
28. Lee J, Kresina TF, Campopiano M, et al.: Use of pharmacotherapies in the treatment of alcohol use disorders and opioid dependence in primary care. *BioMed Research International* 2015:11, 2015
29. Department of Veterans Affairs (VA) and Department of Defense (DOD): Va/dod clinical practice guideline for management of substance use disorders (sud). Available from: <http://www.healthquality.va.gov>, 2009
30. Alford DP, LaBelle CT, Kretsch N, et al.: Five year experience with collaborative care of opioid addicted patients using buprenorphine in primary care. *Archives of Internal Medicine* 171:425-31, 2011
31. Shanahan CW, Beers D, Alford DP, et al.: A transitional opioid program to engage hospitalized drug users. *Journal of General Internal Medicine* 25:803-8, 2010
32. Liebschutz JM, Crooks D, Herman D, et al.: Buprenorphine treatment for hospitalized, opioid-dependent patients: A randomized clinical trial. *JAMA Internal Medicine* 174:1369-76, 2014
33. Dennis M, Scott CK: Managing addiction as a chronic condition. *Addiction Science & Clinical Practice* 4:45-55, 2007
34. McLellan AT, Lewis DC, O'Brien CP, et al.: Drug dependence, a chronic medical illness: Implications for treatment, insurance, and outcomes evaluation. *JAMA* 284:1689-95, 2000
35. Saitz R, Larson MJ, Labelle C, et al.: The case for chronic disease management for addiction. *J Addict Med* 2:55-65, 2008
36. Watkins K, Pincus HA, Tanielian TL, et al.: Using the chronic care model to improve treatment of alcohol use disorders in primary care settings. *J Stud Alcohol* 64:209-18, 2003
37. Wagner EH, Austin BT, Von Korff M: Organizing care for patients with chronic illness. *Milbank Q* 74:511-44, 1996

38. Egginton JS, Ridgeway JL, Shah ND, et al.: Care management for type 2 diabetes in the united states: A systematic review and meta-analysis. *BMC Health Services Research* 12:72, 2012
39. Stellefson M, Dipnarine K, Stopka C: The chronic care model and diabetes management in us primary care settings: A systematic review. *Prev Chronic Dis* 10:E26, 2013
40. Gilbody S, Bower P, Fletcher J, et al.: Collaborative care for depression: A cumulative meta-analysis and review of longer-term outcomes. *Archives of Internal Medicine* 166:2314-21, 2006
41. Woltmann E, Grogan-Kaylor A, Perron B, et al.: Comparative effectiveness of collaborative chronic care models for mental health conditions across primary, specialty, and behavioral health care settings: Systematic review and meta-analysis. *American Journal of Psychiatry* 169:790-804, 2012
42. Bodenheimer T, Wagner EH, Grumbach K: Improving primary care for patients with chronic illness: The chronic care model, part 2. *JAMA* 288:1909-14, 2002
43. Tai B, Volkow ND: Treatment for substance use disorder: Opportunities and challenges under the affordable care act. *Social work in public health* 28:165-74, 2013
44. Kim TW, Saitz R, Cheng DM, et al.: Effect of quality chronic disease management for alcohol and drug dependence on addiction outcomes. *Journal of Substance Abuse Treatment* 43:389-96, 2012
45. Saitz R, Cheng DM, Winter M, et al.: Chronic care management for dependence on alcohol and other drugs: The ahead randomized trial. *JAMA* 310:1156-67, 2013
46. Upshur C, Weinreb L, Bharel M, et al.: A randomized control trial of a chronic care intervention for homeless women with alcohol use problems. *Journal of Substance Abuse Treatment* 51:19-29, 2015
47. McLellan AT, Starrels JL, Tai B, et al.: Can substance use disorders be managed using the chronic care model ? Review and recommendations from a nida consensus group. . *Public Health Reviews* 35:1-14., 2014
48. Weisner C, Mertens J, Parthasarathy S, et al.: Integrating primary medical care with addiction treatment. *JAMA* 286:1715-23, 2001
49. Willenbring ML, Olson DH: A randomized trial of integrated outpatient treatment for medically ill alcoholic men. *Arch Intern Med* 159:1946-52, 1999
50. Oslin D, Lynch K, Maisto S, et al.: A randomized clinical trial of alcohol care management delivered in department of veterans affairs primary care clinics versus specialty addiction treatment. *Journal of General Internal Medicine* 29:162-8, 2014
51. Netherland J, Botsko M, Egan JE, et al.: Factors affecting willingness to provide buprenorphine treatment. *Journal of Substance Abuse Treatment* 36:244-51, 2009
52. Gibson AE, Doran CM, Bell JR, et al.: A comparison of buprenorphine treatment in clinic and primary care settings: A randomised trial. *Med J Aust* 179:38-42, 2003
53. Ling W, Charuvastra C, Collins JF, et al.: Buprenorphine maintenance treatment of opiate dependence: A multicenter, randomized clinical trial. *Addiction* 93:475-86, 1998
54. Anton RF, O'Malley SS, Ciraulo DA, et al.: Combined pharmacotherapies and behavioral interventions for alcohol dependence: The combine study: A randomized controlled trial. *JAMA* 295:2003-17, 2006
55. Jonas DE, Amick HR, Feltner C, et al.: Pharmacotherapy for adults with alcohol use disorders in outpatient settings: A systematic review and meta-analysis. *JAMA* 311:1889-900, 2014
56. Mattick RP, Breen C, Kimber J, et al.: Buprenorphine maintenance versus placebo or methadone maintenance for opioid dependence. *Cochrane Database of Systematic Reviews* 2:CD002207, 2014
57. Park TW, Samet JH, Cheng DM, et al.: The prescription of addiction medications after implementation of chronic care management for substance dependence in primary care. *Journal of Substance Abuse Treatment* 52:17-23, 2015

58. LaBelle CT, Han SC, Bergeron A, et al.: Office-based opioid treatment with buprenorphine (OBOT-B): Statewide implementation of the Massachusetts collaborative care model in community health centers. *Journal of Substance Abuse Treatment* 60:6-13, 2016
59. Hutchinson E, Catlin M, Andrilla CH, et al.: Barriers to primary care physicians prescribing buprenorphine. *Annals of Family Medicine* 12:128-33, 2014
60. Roman PM, Abraham AJ, Knudsen HK: Using medication-assisted treatment for substance use disorders: Evidence of barriers and facilitators of implementation. *Addictive Behaviors* 36:584-9, 2011
61. Harris AHS, Ellerbe L, Reeder RN, et al.: Pharmacotherapy for alcohol dependence: Perceived treatment barriers and action strategies among veterans health administration service providers. *Psychol Serv* 10:410-9, 2013
62. Institute of Medicine: Crossing the quality chasm: A new system for the 21st century. Washington, D.C.: National Academy Press, 2001
63. Institute of Medicine: Improving the quality of mental health care for mental and substance-use conditions. Washington DC: The National Academies Press, 2006
64. Barry MJ, Edgman-Levitan S: Shared decision making — the pinnacle of patient-centered care. *New England Journal of Medicine* 366:780-1, 2012
65. Bradley KA, Kivlahan DR: Bringing patient-centered care to patients with alcohol use disorders. *JAMA* 311:1861-2, 2014
66. Carroll KM: Dissemination of evidence-based practices: How far we've come, and how much further we've got to go. *Addiction* 107:1031-3, 2012
67. Mark TL, Kassed CA, Vandivort-Warren R, et al.: Alcohol and opioid dependence medications: Prescription trends, overall and by physician specialty. *Drug and Alcohol Dependence* 99:345-9, 2009
68. Substance Abuse and Mental Health Services Administration: Results from the 2013 national survey on drug use and health: Summary of national findings; in NSDUH Series H-48, HHS, Publication No (SMA) 14-4863. Rockville, MD: Substance Abuse and Mental Health Services Administration, 2014
69. Dutra L, Stathopoulou G, Basden SL, et al.: A meta-analytic review of psychosocial interventions for substance use disorders. *American Journal of Psychiatry* 165:179-87, 2008
70. Kleber HD, Weiss RD, Anton RF, Jr., et al.: Treatment of patients with substance use disorders, second edition. American Psychiatric Association. *American Journal of Psychiatry* 164:5-123, 2007
71. Glasner-Edwards S, Rawson R: Evidence-based practices in addiction treatment: Review and recommendations for public policy. *Health Policy* 97:93-104, 2010
72. Skinner MD, Lahmek P, Pham H, et al.: Disulfiram efficacy in the treatment of alcohol dependence: A meta-analysis. *PLoS One* 9:e87366, 2014
73. Morgenstern J, McKay JR: Rethinking the paradigms that inform behavioral treatment research for substance use disorders. *Addiction* 102:1377-89, 2007
74. Berglund M: A better widget? Three lessons for improving addiction treatment from a meta-analytical study. *Addiction* 100:742-50, 2005
75. Ghitza UE: Aspire model for treating cannabis and other substance use disorders: A novel personalized-medicine framework. *Front Psychiatry* 5:180, 2014
76. Stacey D, Bennett CL, Barry MJ, et al.: Decision aids for people facing health treatment or screening decisions. *Cochrane Database Syst Rev*:CD001431, 2011
77. Makoul G, Clayman ML: An integrative model of shared decision making in medical encounters. *Patient Education and Counseling* 60:301-12, 2006

78. Swift JK, Callahan JL, Vollmer BM: Preferences. *Journal of Clinical Psychology* 67:155-65, 2011
79. Robinson JC: Theory and practice in the design of physician payment incentives. *Milbank Quarterly* 79:149-77, III, 2001
80. Stewart MT, Horgan CM: Health services and financing of treatment. *Alcohol Research & Health* 33:389-94, 2011
81. Kathol RG, Melek S, Bair B, et al.: Financing mental health and substance use disorder care within physical health: A look to the future. *Psychiatr Clin North Am* 31:11-25, 2008
82. Urada D, Antonini VP, Oeser B, et al.: Evaluation, training, and technical assistance for substance use disorder services integration: Prepared for the Department of Health Care Services California Health and Human Services Agency, 2013
83. Butler M, Kane RL, McAlpine D, et al.: Integration of mental health/substance abuse and primary care. *Evid Rep Technol Assess (Full Rep)*:1-362, 2008
84. Song Z, Rose S, Safran DG, et al.: Changes in health care spending and quality 4 years into global payment. *New England Journal of Medicine* 371:1704-14, 2014
85. de Bakker DH, Struijs JN, Baan CA, et al.: Early results from adoption of bundled payment for diabetes care in the netherlands show improvement in care coordination. *Health Affairs* 31:426-33, 2012
86. Parthasarathy S, Mertens J, Moore C, et al.: Utilization and cost impact of integrating substance abuse treatment and primary care. *Med Care* 41:357-67, 2003
87. Hermann RC, Rollins CK, Chan JA: Risk-adjusting outcomes of mental health and substance-related care: A review of the literature. *Harvard review of psychiatry* 15:52-69, 2007
88. Garnick DW, Horgan CM, Chalk M: Performance measures for alcohol and other drug services. *Alcohol Research & Health* 29:19-26, 2006
89. Unützer J, Chan Y-F, Hafer E, et al.: Quality improvement with pay-for-performance incentives in integrated behavioral health care. *American Journal of Public Health* 102:e41-e5, 2012
